# Supplementary material
Source: PubMed Central journal article supplement (PMC7817161)
Supplement: pnas.1917623117.sapp.pdf [file pnas.1917623117.sapp.pdf]

## SI Appendix

### **PACAP is a pathogen-inducible resident antimicrobial neuropeptide affording rapid and contextual molecular host defense of the brain**

Ernest Y. Lee<sup>1</sup>, Liana C. Chan<sup>2,3</sup>, Huiyuan Wang<sup>2,3</sup>, Juelline Lieng<sup>1</sup>, Mandy Hung<sup>1</sup>, Yashes Srinivasan<sup>1</sup>, Jennifer Wang<sup>1</sup>, James A. Waschek<sup>4</sup>, Andrew L. Ferguson<sup>5</sup>, Kuo-Fen Lee<sup>6</sup>, Nannette Y. Yount<sup>2,3</sup>, Michael R. Yeaman<sup>2,3,7\*</sup>, Gerard C.L. Wong<sup>1,8,9\*</sup>

<sup>1</sup>Department of Bioengineering, University of California, Los Angeles, Los Angeles, CA 90095, USA

<sup>2</sup>Lundquist Institute for Biomedical Innovation at Harbor-UCLA Medical Center, Torrance, CA 90509, USA

<sup>3</sup>Divisions of Molecular Medicine & Infectious Diseases, Los Angeles County, Harbor-UCLA Medical Center, Torrance, CA 90509, USA

<sup>4</sup>Semel Institute for Neuroscience and Human Behavior, Intellectual Development and Disabilities Research Center, David Geffen School of Medicine, University of California, Los Angeles, Los Angeles, CA 90095, USA

<sup>5</sup>Pritzker School of Molecular Engineering, University of Chicago, 5640 South Ellis Avenue, Chicago, IL 60637, USA

<sup>6</sup>Salk Institute for Biological Studies, Peptide Biology Laboratories, La Jolla, CA 92037, USA

<sup>7</sup>Department of Medicine, David Geffen School of Medicine, University of California, Los Angeles, Los Angeles CA 90095, USA

<sup>8</sup>Department of Chemistry and Biochemistry, University of California, Los Angeles, Los Angeles, CA 90095, USA

<sup>9</sup>California NanoSystems Institute, University of California, Los Angeles, Los Angeles, CA 90095, USA

\*Equal contribution: Correspondence and requests for materials should be addressed to G.C.L.W. ([gclwong@seas.ucla.edu](mailto:gclwong@seas.ucla.edu)) or M.R.Y. ([MRYeaman@ucla.edu](mailto:MRYeaman@ucla.edu)).



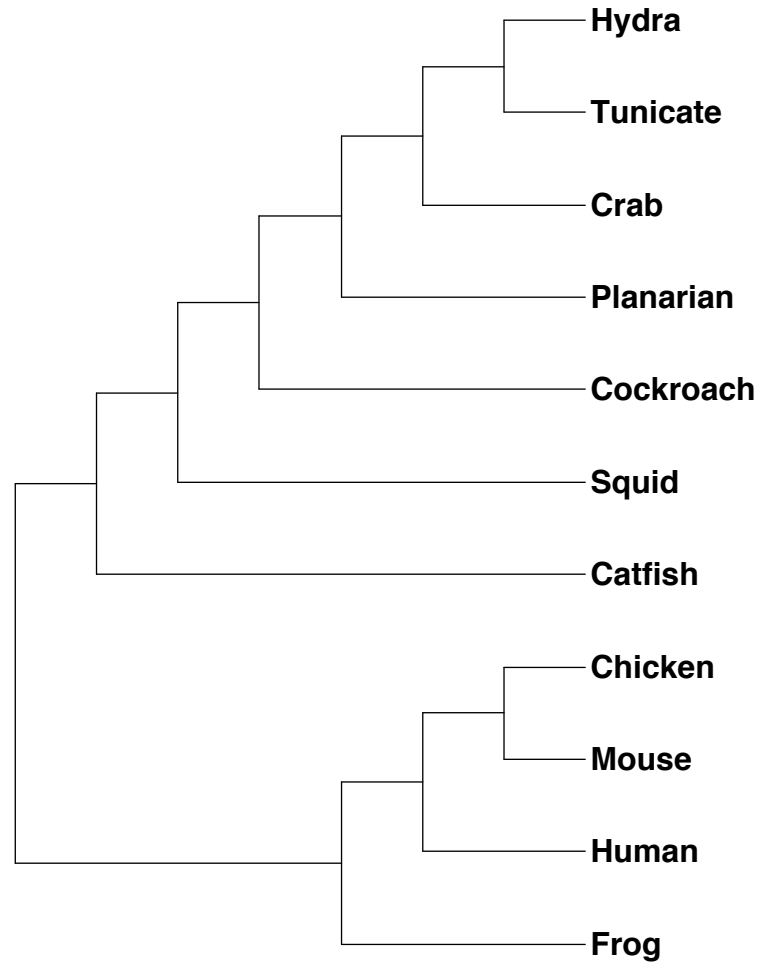

Figure S3: **Phylogenetic reconstruction of selected PACAP sequences from vertebrates and invertebrates.** A neighbor-joining tree visualization of PACAP peptide family was computed from the sequence alignment in Figure S2 using PhyML in SeaView.

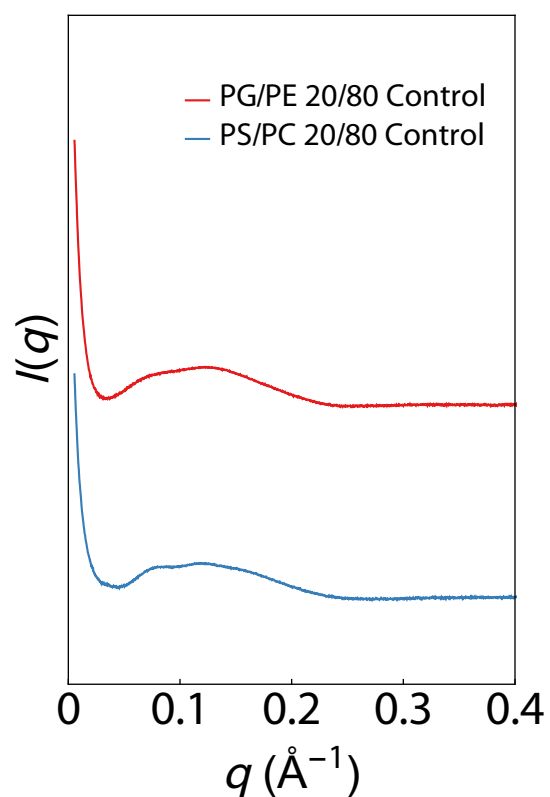

Figure S4: **SAXS spectra of SUV Controls.** Broad scattering form factors are observed for the bacteria-like PG/PE = 20/80 control as well as the eukaryotic-like PS/PC = 20/80 SUVs used to quantify AMP-membrane interactions. No strong scattering was observed from the membranes alone.



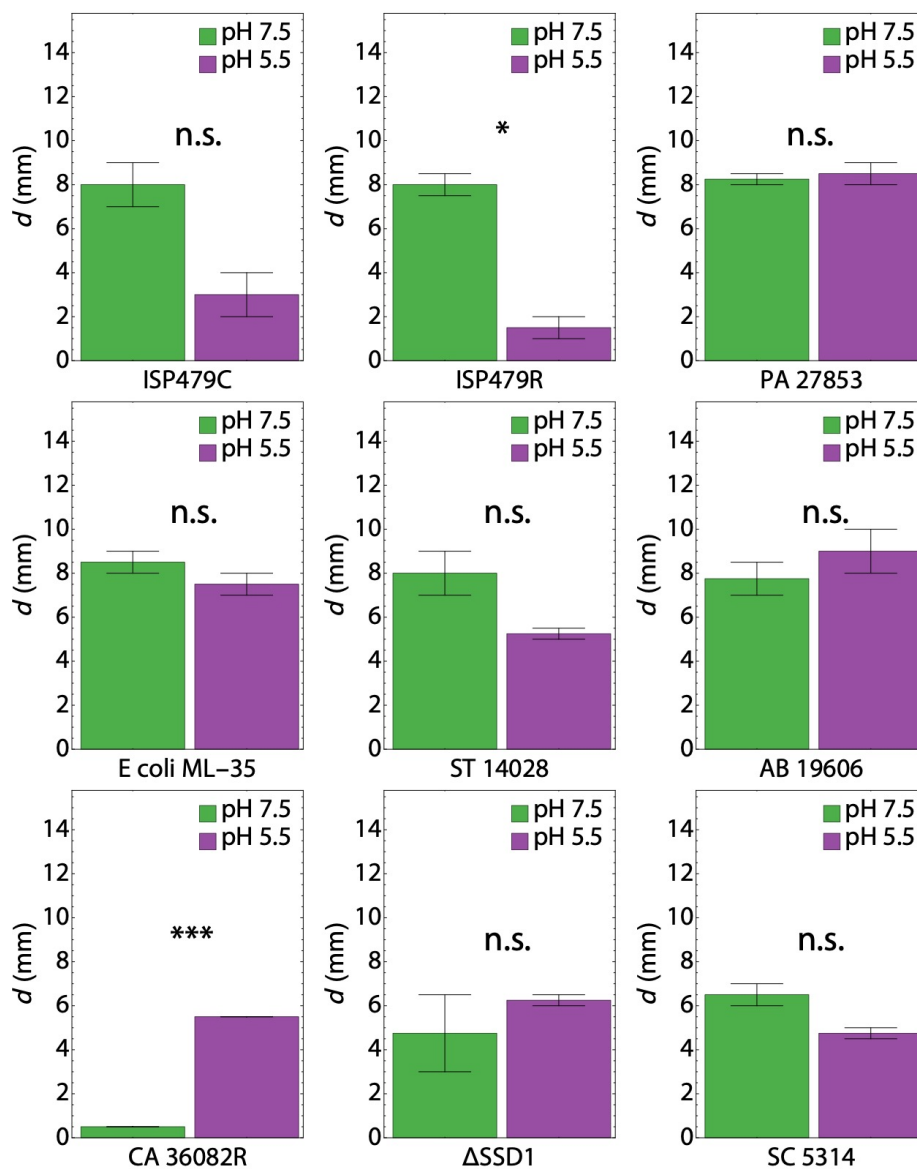

Figure S5: **Context dependent antimicrobial activity of PACAP across a broad range of organisms.** PACAP exhibits antimicrobial activity against sensitive and resistant strains of *S. aureus* better at pH 7.5 vs pH 5.5. Interestingly, PACAP kills certain strains of *C. albicans* better at pH 5.5 than pH 7.5. In other cases, like *P. aeruginosa* and *A. baumannii*, the antimicrobial effect of PACAP is less pH dependent. PACAP exhibits context-dependent antimicrobial activity across various pH conditions. \* $P < 0.05$ , \*\* $P < 0.01$ , \*\*\* $P < 0.001$ , not significant (n.s.). P-values were calculated using a two-tailed Student's t-test.

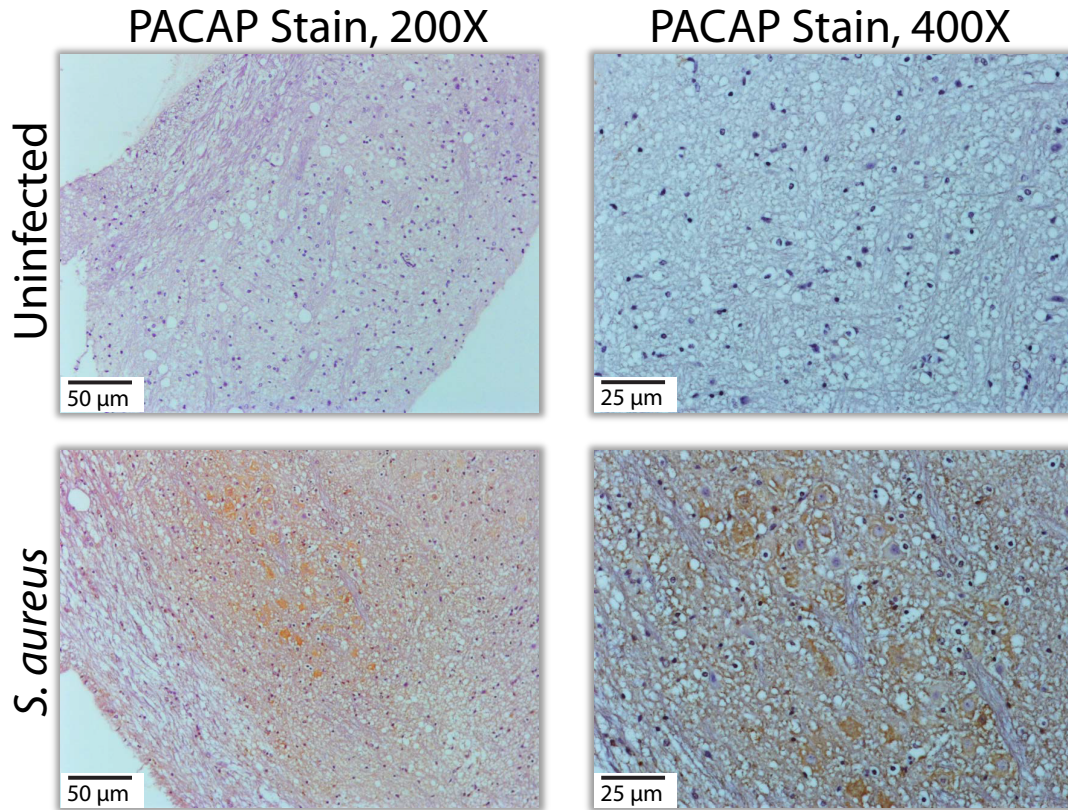

Figure S6: **PACAP is strongly induced in brain tissue in *S. aureus* infection.** PACAP staining shown at 200x and 400x magnification with corresponding scale bars.

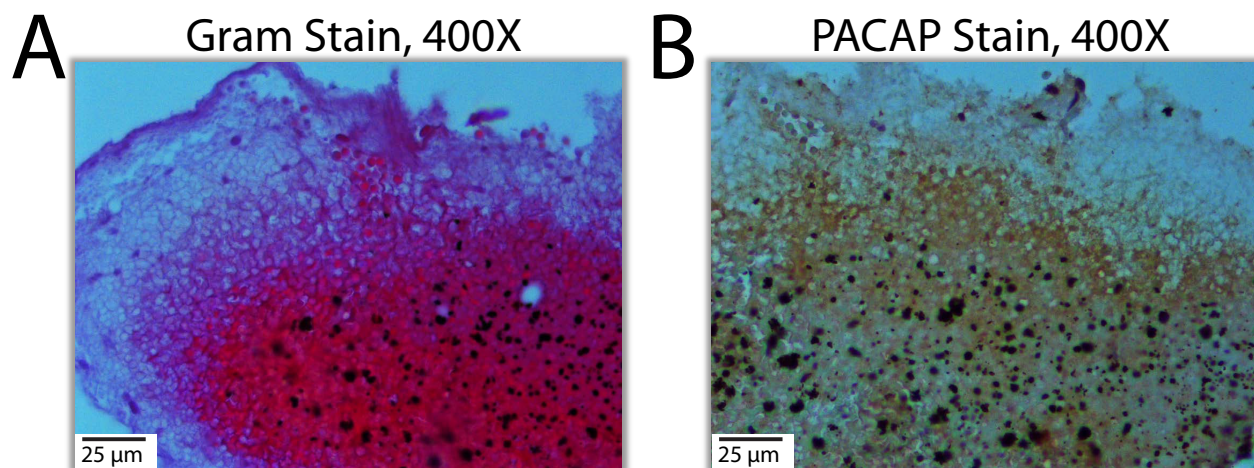

Figure S7: **PACAP colocalizes with bacteria during *S. aureus* brain infection.** Gram stain and PACAP stain of similar brain tissue sections are shown at 400x magnification.

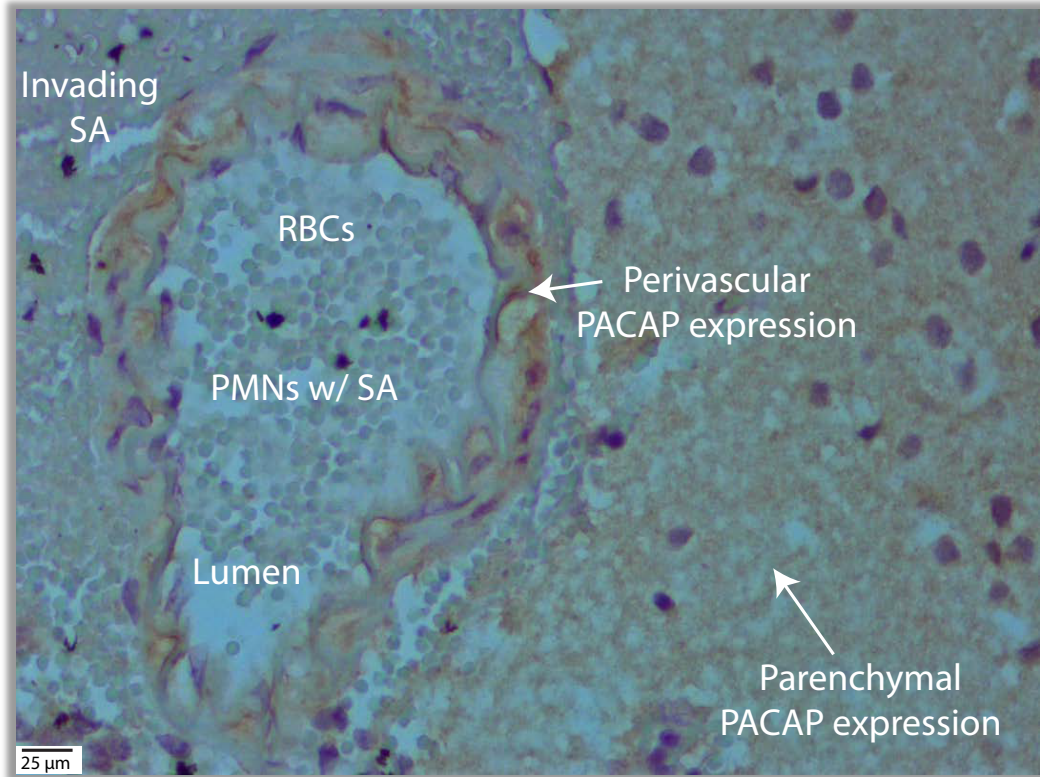

Figure S8: **PACAP is induced in the perivascular and parenchymal brain tissue in response to invading *S. aureus*.**



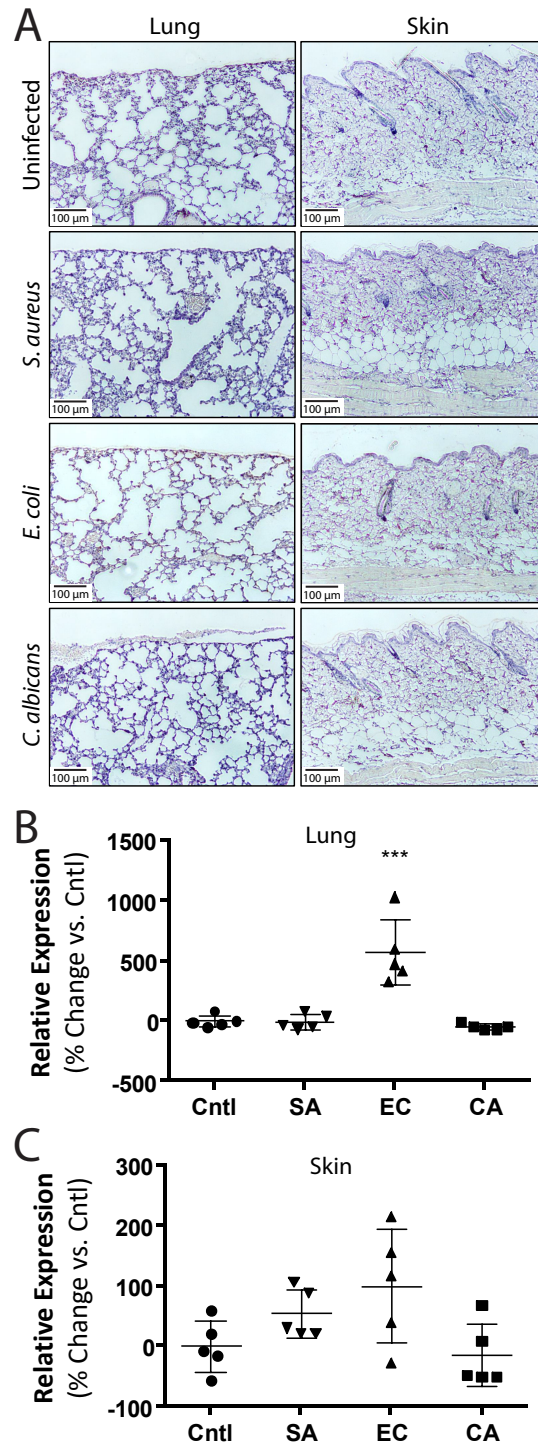

Figure S9: **Additional immunohistochemistry of PACAP in lung and skin tissue in mouse models of bacterial and fungal septicemia.** PACAP is selectively induced in the lung in response to *E. coli* (EC) infection but not to *S. aureus* (SA) or *C. albicans* (CA) compared to control (Cntrl). PACAP is expressed at low levels in the skin but is not appreciably induced in the context of septicemic infection. \* $P < 0.05$ , \*\* $P < 0.01$ , \*\*\* $P < 0.001$ . All other comparisons not significant. P-values were calculated using a two-tailed Student's t-test.
